# Crowding Reveals Fundamental Differences in Local vs. Global Processing in Humans and Machines

Doerig, A.<sup>†</sup>, Borner, A.<sup>†</sup>, Choung, O. H., Herzog, M. H.

Laboratory of Psychophysics, Brain Mind Institute, Ecole Polytechnique Fédérale de Lausanne (EPFL), Switzerland

<sup>†</sup> These authors contributed equally to this work.

## Abstract

Feedforward Convolutional Neural Networks (ffCNNs) have become state-of-the-art models both in computer vision and neuroscience. However, human-like performance of ffCNNs does not necessarily imply human-like computations. Previous studies have suggested that current ffCNNs do not make use of global shape information. However, it is currently unclear whether this reflects fundamental differences between ffCNN and human processing or is merely an artefact of how ffCNNs are trained. Here, we use visual crowding as a well-controlled, specific probe to test global shape computations. Our results provide evidence that ffCNNs cannot produce human-like global shape computations for principled architectural reasons. We lay out approaches that may address shortcomings of ffCNNs to provide better models of the human visual system.

## Introduction

Vision is a complex process that remained beyond the reach of computer systems for decades. Only recently, deep feedforward Convolutional Neural Networks (ffCNNs) have shown tremendous success in an impressive number of computer vision tasks, ranging from object recognition (Krizhevsky, Sutskever, & Hinton, 2012) and segmentation (Girshick, Radosavovic, Gkioxari, Dollár, & He, 2018), to image synthesis (Goodfellow et al., 2014; Karras, Laine, & Aila, 2018) and scene understanding (Eslami et al., 2018). ffCNNs and the human visual system share several similarities. For example, ffCNN neural activities show high correlations with human and non-human primate neural activities (Khaligh-Razavi & Kriegeskorte, 2014; Nayebi et al., 2018;

Yamins et al., 2014) and the receptive fields of neurons in the earlier layers of ffcNNs are qualitatively similar to those in the retina and early visual cortex (Lindsey, Ocko, Ganguli, & Deny, 2019; Zeiler & Fergus, 2014). Because of these similarities, ffcNNs were proposed as models of the human visual system (Khaligh-Razavi & Kriegeskorte, 2014; Kietzmann, McClure, & Kriegeskorte, 2018; Nayebi et al., 2018; VanRullen, 2017; Yamins et al., 2014). However, human-like performance of ffcNNs does not necessarily imply human-like computations. Importantly, several studies have shown that ffcNNs usually rely on local features while humans strongly rely on global shape information (Baker, Lu, Erlikhman, & Kellman, 2018; Brendel & Bethge, 2019; Doerig et al., 2019; Kim, Bair, & Pasupathy, 2019).

There are two main options to explain why ffcNNs do not process global shape like humans. First, this difference may come from *training*. ffcNNs are typically trained on ImageNet (Deng et al., 2009). It is interesting and surprising that local features seem to be the easiest way for these networks to classify natural images. However, a different training set in which local features are not predictive of the classes may require networks to rely on global shape computations. To address this possibility, Geirhos et al. (2018) created a new dataset in which textural information was of no avail for object recognition. They used a textural algorithm (Gatys, Ecker, & Bethge, 2016) to randomly swap textures in ImageNet. For example, the texture of a cat image was replaced by elephant-skin texture. This training dataset biased an ffcNN (ResNet50; He, Zhang, Ren, & Sun, 2016) towards shape-level features, because textural information was no longer useful for classifying this dataset. They validated the network's shape-bias by showing increased robustness to local noise and textural changes.

Alternatively, ffcNNs may be incapable of matching human global computations for principled *architectural* reasons. Even though Geirhos et al.'s network was able to ignore local features, it may not use global computations in the same way as humans. One difficulty in addressing this question is that there is no consensus about how to experimentally diagnose *how* deep networks compute global information.

To specifically investigate local vs. global processing in humans and machines, we use visual crowding as an experimental probe. In crowding, perception of a target deteriorates in the

presence of flanking elements (Fig. 1a). Interestingly, the *global* configuration of flankers across the entire visual field determines crowding. For example, adding flankers as far away as 8.5 degrees from the 200 arcsec target can *improve* performance depending on the global configuration (*uncrowding*; Fig.1a; Manassi, Lonchampt, Clarke, & Herzog, 2016; Manassi, Sayim, & Herzog, 2012). This strong dependency of performance on global configurations provides a qualitative signature which can easily be tested in models. Importantly, (un)crowding is ubiquitous since elements rarely appear in isolation. Furthermore, (un)crowding occurs across multiple paradigms and is not restricted to vision (Herzog & Fahle, 2002; Oberfeld & Stahn, 2012; Overvliet & Sayim, 2016; Sayim, Westheimer, & Herzog, 2010). Hence, (un)crowding is not an idiosyncratic effect related to a specific paradigm. It rather reflects a general strategy used by the brain. This kind of general strategy for vision is precisely what we expect models to explain.

In ffCNNs, crowding may occur by pooling the target and nearby flankers along the processing hierarchy. We hypothesize that this mechanism may not produce uncrowding because simple pooling can only deteriorate target-relevant information when flankers are added (Fig. 1b). However, intuitions are not to be trusted in complex systems with millions of parameters. Furthermore, new global processing strategies may emerge in shape-biased networks such as Geirhos et al.'s. Hence, it is currently unclear whether ffCNNs can carry out human-like global computations that lead to (un)crowding. Here, we thoroughly investigated (un)crowding in AlexNet (Krizhevsky et al., 2012), an ffCNN that was used as a model of the human visual system (Khaligh-Razavi & Kriegeskorte, 2014; Zeiler & Fergus, 2014), ResNet50 (He et al., 2016), a more sophisticated ffCNN, and the shape-biased network by Geirhos et al. (2018). We provide experimental evidence suggesting that it is the *architecture* of ffCNNs that prevent them from performing human-like global computations, and not the training procedure.

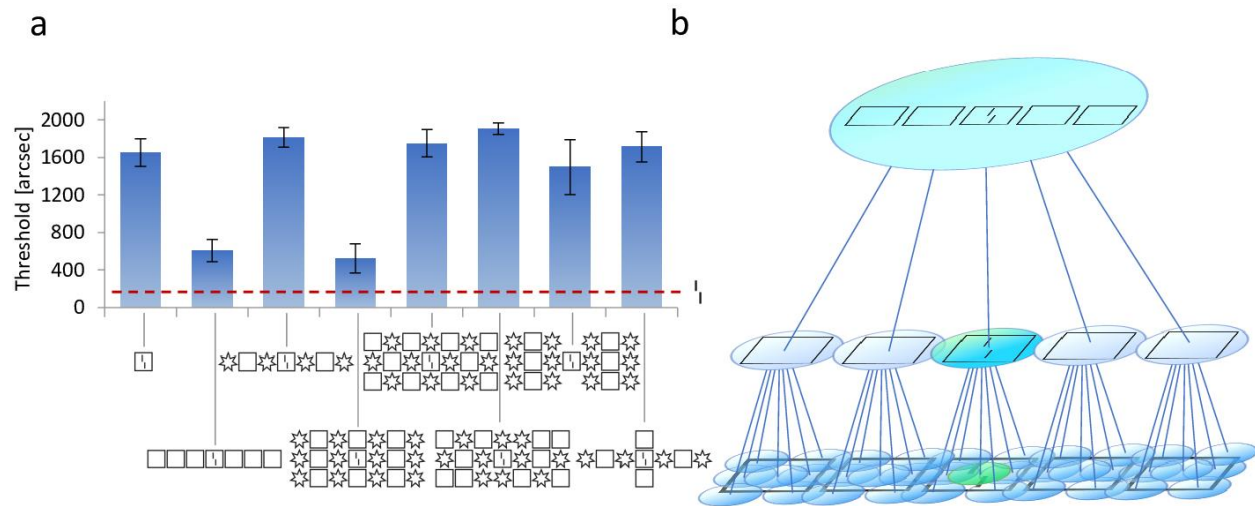

78

79 **Figure 1. a. (Un)crowding:** In crowding, perception of a target deteriorates in the presence of nearby flankers. In this  
80 experiment, observers reported the horizontal offset direction of two vertical bars (i.e., a *vernier*) presented at 9° of  
81 eccentricity. The vernier was presented either alone (red dashed line) or surrounded by a flanker configuration (x-  
82 axis). The y-axis shows the offset for which observers correctly report the vernier offset direction in 75% of the trials  
83 (threshold; performance is good when the threshold is low). When the vernier is presented alone, the task is easy  
84 (red dashed line). Adding a flanking square (column 1) makes the task much harder, a classic crowding effect. When  
85 more squares are added, performance recovers almost to the unflanked level (second column, *uncrowding*).  
86 Uncrowding strongly depends on the configuration (columns 2 to 8). For example, column 4 shows a configuration  
87 of flankers with a strong uncrowding effect. In comparison, column 5 has the same flankers but in a different  
88 configuration producing strong crowding. Reproduced from Doerig et al. (2019). **b. Crowding in ffCNNs:** In the  
89 feedforward framework of vision, embodied by ffCNNs, crowding occurs by pooling of visual features across a  
90 hierarchy of local feature detectors. In this example, a stimulus with five squares and a vernier target is presented.  
91 Each circle represents a neuron and shows the elements in its receptive field. In early layers, receptive fields are  
92 small and the vernier is in the receptive field of a single neuron (green). Neighbouring neurons respond to parts of  
93 the squares (blue). At this level, the vernier is well represented. In the next layer, however, information about the  
94 vernier is pooled with information of the surrounding flanker. Vernier-related information is "corrupted" by the  
95 flankers, making the offset direction harder to decode (crowding; blue-green). In subsequent layers, even more  
96 target-unrelated information is pooled. For this reason, we hypothesize that adding more flankers may always lead  
97 to more crowding in ffCNNs.

## Methods

Code and supplementary material are available online at <https://github.com/adriendoerig/Doerig-Bornet-Choung-Herzog-2019>.

### Experiment 1a

We presented different (un)crowding stimuli to AlexNet (pretrained on ImageNet) and assessed how information about the target vernier is preserved along the network hierarchy. We used decoders to detect vernier offset direction based on the activity in each layer (Fig. 2). Each layer had its own decoder, consisting of batch normalization (Ioffe & Szegedy, 2015), followed by a hidden layer of 512 units, followed by an ELU non-linearity (Clevert, Unterthiner, & Hochreiter, 2015), finally projecting to a softmax layer composed of 2 nodes coding for left and right offsets. The decoders were trained using Adam optimizers (Kingma & Ba, 2014) to minimize the cross-entropy between the predicted and the presented vernier offsets. Each image in the training set consisted of a vernier plus a non-overlapping random configuration of flankers (composed of 18x18 pixels squares, circles, hexagons, octagons, stars or diamonds). These configurations had between 1 and 7 columns and between 1 and 3 rows of flankers of the same shape. We added Gaussian noise to each image. Training was successful, i.e., the network was well able to detect the vernier offset direction in the training images.

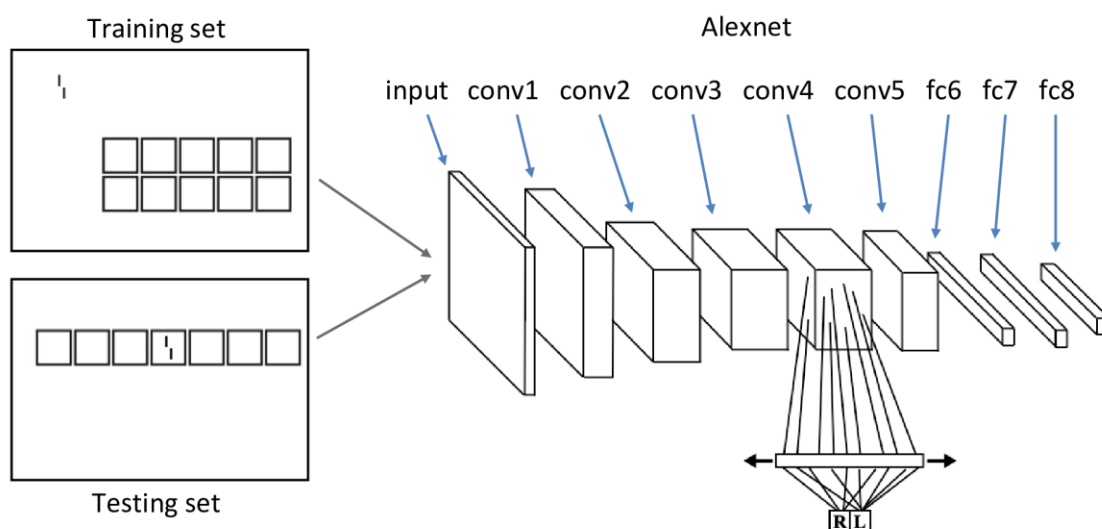

**Figure 2.** Different stimuli were fed to AlexNet. AlexNet’s weights were pretrained on ImageNet and were frozen during the experiment. To investigate how well information about the vernier offset is preserved throughout the network hierarchy, we trained decoders to discriminate the vernier offset direction in each layer. In the training set, the vernier and a flanker configuration were simultaneously shown, but never overlapped (top). In the testing set, we presented 72 different (un)crowding configurations and measured performance for each configuration and each layer. In these testing images, the vernier was always surrounded by the flanker configuration (bottom). In this example, configurations of squares are shown, but we also used different shapes (see main text).

Our main question was how the network generalizes to the (un)crowding stimuli. Importantly, during training, the vernier target and the flanking configurations were presented simultaneously but never overlapped (Fig. 2). During testing the vernier was surrounded by different flanker configurations, as in the psychophysical (un)crowding stimuli (Fig. 2). The testing set consisted of 72 different configurations of flankers with Gaussian noise. There were 6400 trials per configuration with the configuration presented at different locations. For each layer of AlexNet, performance was measured as the proportions of correct vernier offset discrimination made by the decoder. We repeated this entire procedure 5 times, including training and testing, and report averaged performances.

## Experiment 1b

We tested an ffCNN with a more sophisticated architecture (ResNet50) and the same ffCNN explicitly biased towards global shape computations (Geirhos et al.’s shape-biased version of ResNet50). To this end, we applied exactly the same procedure as in experiment 1a to both the original version of ResNet50 and Geirhos et al.’s shape-biased version. The only difference was that we used 64 hidden units instead of 512, because this achieved better performance (i.e., better classification performance on crowded conditions).

## Experiment 2

In experiment 2, we investigated which parts of the stimulus configurations the network mainly relies on by using an occlusion sensitivity measure (similarly to Zeiler & Fergus, 2014). We used the networks with decoders trained in experiment 1. For a given configuration, we collected the

vernier offset decoder's output at each layer. Then we slid a 6x6 pixels Gaussian noise patch over the entire configuration and measured for each patch position P and network layer L how much the noise patch affected the vernier offset discrimination. The noise patch had the same statistics as the background noise, effectively removing parts of the stimulus. The rationale is that when the patch occludes parts of the stimulus, which are important for classification, decoder predictions should be strongly affected. On the other hand, if the patch occludes an unimportant part of the stimulus, decoder predictions should not be affected. Since the global stimulus configuration matters for uncrowding, we were interested to see if the network relies on the global configuration or if it simply focused on the region close to the vernier.

For each patch location P and layer L, we quantified how much the noise patch biased vernier offset classification towards or away from the correct response:

$$score_{P,L} = \frac{\{\vec{T} \cdot (\vec{y}_{P,L} - \vec{x}_L)\}_{left\_vernier}}{2} + \frac{\{\vec{T} \cdot (\vec{y}_{P,L} - \vec{x}_L)\}_{right\_vernier}}{2}$$

Where  $\vec{x}_L = (x_1, x_2)_L$  is the output of the decoder for layer L on the original stimulus *without* a noise patch ( $x_1$  and  $x_2$  respectively correspond to the network's prediction for a left- or right-offset vernier),  $\vec{y}_{P,L} = (y_1, y_2)_{P,L}$  is the output of the decoder for layer L *with* the noise patch at position P and  $\vec{T}$  is a vector equal to  $(+1, -1)$  if the correct vernier offset is left and  $(-1, +1)$  otherwise. To avoid biases related to offset direction, we computed the mean score of the left- and right-offset versions of each stimulus.

Using this procedure, we obtained maps indicating which regions of a stimulus are most important for vernier offset discrimination. We used four different stimuli from Manassi et al. (2016): a vernier alone, a vernier flanked by one square (leading to crowding in humans), a vernier flanked by a row of seven squares (leading to uncrowding in humans), and a vernier flanked by a row of seven alternating squares and stars (no uncrowding in humans). Additional stimuli are shown in the supplementary material.

# Results

## Experiment 1a

Unlike humans, AlexNet shows crowding but *not uncrowding*. The vernier offset is easily decoded from each layer when the vernier is presented alone, and performance drops when a single flanker is added. Crucially, performance deteriorates further when more flankers are added, regardless of the shape type (Fig. 3a). Squares produced more crowding than circles, hexagons, octagons or diamonds, presumably because the vertical bars of the squares interfered with the vernier more strongly. These results hold for all layers of AlexNet (supplementary material).

Fig. 3b shows that only the number of flanking shapes and not their configuration affects crowding in AlexNet, contrary to humans. This pattern of results is similar in all layers of AlexNet (supplementary material).

## Experiment 1b

We applied the same analysis to the original ResNet50 and Geirhos et al.'s shape-biased version of ResNet50. The results for both networks are qualitatively similar to the results for AlexNet in experiment 1a (Fig. 3c&d). First, this shows that using a more sophisticated architecture (i.e., ResNet50) does not allow ffCNNs to explain global uncrowding effects. Second, crucially, Geirhos et al.'s method to bias ffCNNs towards shape does not lead to human-like shape level computations.



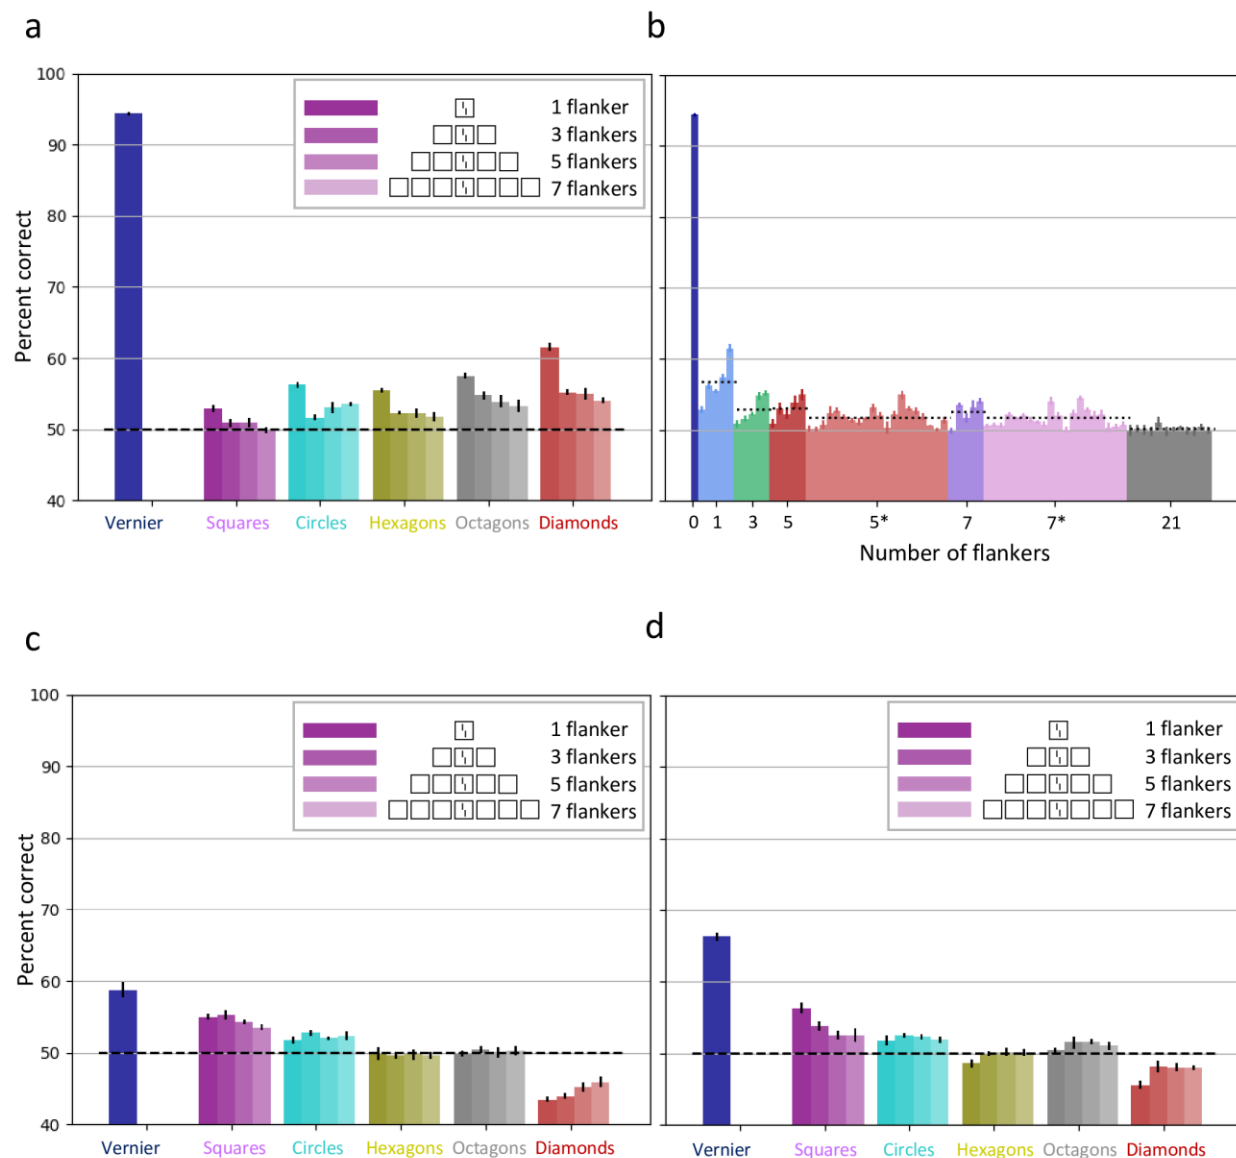

189  
190 **Figure 3. a. Vernier offset discrimination performance for AlexNet with an increasing number of identical flankers.** The  
191 x-axis shows different flanker configurations. Each color corresponds to one flanker shape, and brighter colors  
192 indicate more flankers (from darkest to lightest: 1, 3, 5 & 7 identical flankers). The single dark blue bar on the left  
193 corresponds to the vernier alone condition. The y-axis indicates the percentage of correct vernier offset responses.  
194 Unlike humans, for whom performance improves when more identical flankers are added (Fig. 1c, columns 1&2;  
195 Manassi et al., 2016), performance deteriorates or stagnates for AlexNet with all flanker shapes. The results of this  
196 figure are decoded from layer 5 of AlexNet. Decoding vernier offsets from the other layers in AlexNet led to similar  
197 results (see supplementary material). **b. Vernier offset discrimination performance for AlexNet with 72 configurations.**  
198 The x-axis shows different flanker configurations sorted by number of flankers. Different colors correspond to

different kinds of flanker configurations. The labels correspond to the number of flankers in the configuration, and an asterisk indicates alternating shapes (e.g. square-circle-square-circle-square). From left to right: vernier alone, single flanker, 3 identical flankers, 5 identical flankers, 5 flankers alternating between two shapes, 7 identical flankers, 7 flankers alternating between two shapes and configurations of 3x7 flankers. The y-axis indicates percent correct of vernier offset discrimination for each flanker configuration (the dashed lines shows the mean percent correct for each kind of flanker configuration). Unlike humans, who show strong uncrowding depending on the configuration, only the number of shapes seems to affect crowding in AlexNet – and not the configuration. Although certain configurations with three flankers have a higher percentage of correct response than certain configurations with a single flanker, this effect is driven by the shape type and not by the configuration of shapes. For example, Fig. 3a shows that the networks are better at dealing with diamonds than squares (probably because squares interfere more with verniers due to the vertical orientation of their edges). Still, adding extra shapes always deteriorates performance compared to a single shape, regardless of the configuration. The results of this figure are decoded from layer 5 of AlexNet. Decoding vernier offsets from the other layers in AlexNet led to similar results (see supplementary material). **c&d. Vernier offset discrimination performance for (shape-biased) ResNet50 with an increasing number of identical flankers.** c. original version. d. Geirhos et al.’s shape-biased version. The results for both of these networks are qualitatively similar for the AlexNet results in panel a. One difference is that the decoder is always below chance level with diamonds. This indicates that information about the vernier offset survives, even though the diamond flanker flips the prediction. Adding additional diamond flankers brings performance closer to chance level, indicating that less information about the vernier offset survives, i.e., crowding increases when adding flankers. Another difference is that the squares lead to the least amount of crowding, contrary to AlexNet. The results of this figure are decoded from the output of the third bottleneck unit (see our shared code and He et al., 2016). Decoding vernier offsets from the other layers led to similar results (see supplementary material).

## Experiment 2

Uncrowding requires global computations across large regions of the visual space. The configuration in its entirety determines performance and not only the elements in the neighborhood of the target (Doerig, Bornet, et al., 2019; Manassi et al., 2016, 2012). As mentioned, it has been proposed that ffCNNs focus largely on local features. This is indeed what we observed in experiment 2 in AlexNet (Fig. 4), ResNet50 (supplementary material), and Geirhos et al.’s shape-biased version of ResNet50 (Fig. 4): only elements in a local region around the target matter for classification. The same results also hold for the eight other stimulus types we tested (supplementary material). Importantly, these results show that although Geirhos et

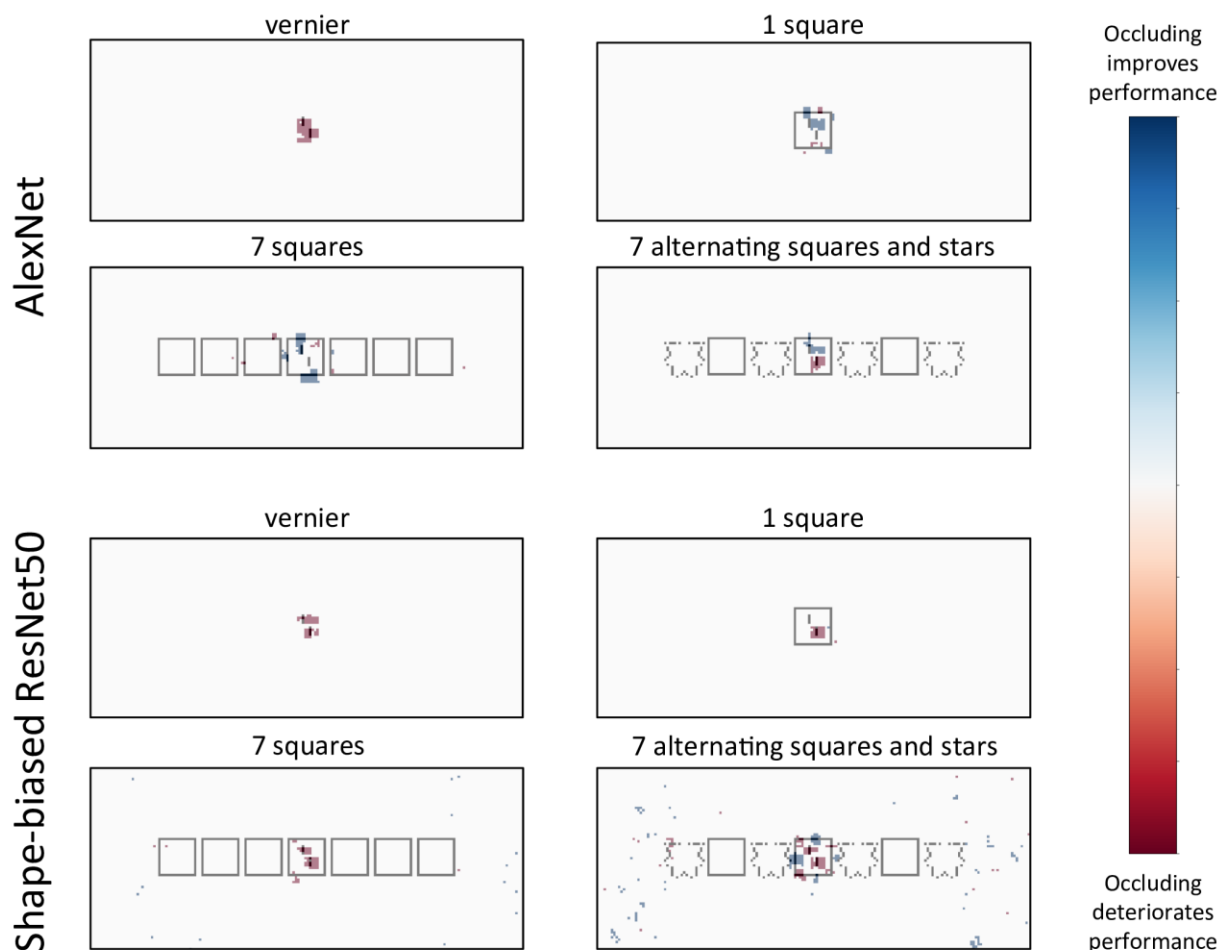

**Figure 4: Occlusion analysis.** Results of the occlusion analysis for AlexNet (*top*) and the shape-biased ResNet50 (*bottom*). Stimuli on the left lead to good performance in humans, while stimuli on the right lead to strong crowding in humans (Manassi et al., 2016). For both AlexNet and the shape-biased ResNet50, the network's decisions rely only on local elements in the target neighborhood regardless of the global stimulus configurations. To create these maps, we summed the maps for each layer of Alexnet to show which stimulus regions are most relevant across the network. For the shape-biased ResNet50, we used the third convolutional layer in the first bottleneck, and the output of the first 9 bottleneck units (see our shared code and He et al., 2016). We then applied a threshold to each map at 0.4 times the maximal value in the map, for visibility. Per-layer results without thresholding can be found in the supplementary material, as well as animations showing what happens as the threshold value is changed. Results for the original ResNet50 and other layers of the shape-biased network are also shown in the supplementary material.

## Discussion

(Un)crowding is ubiquitous. It occurs in vision, audition and haptics (Manassi et al., 2016; Oberfeld & Stahn, 2012; Overvliet & Sayim, 2016; Whitney & Levi, 2011). This pervasiveness is not surprising because elements rarely appear in isolation. Any perceptual system needs to cope with crowding to process information in cluttered environments. (Un)crowding is a probe into how the visual system computes global information.

Experiment 1 shows that current ffCNNs do not explain (un)crowding. In other words, training an ffCNN on a complex natural image recognition task does not automatically yield a network performing similarly to the human visual system. Experiment 2 suggests that this is due to the inability of ffCNNs to take the entire stimulus configuration into account. In ffCNNs, only elements in the target's neighborhood affect performance. Global features do not affect how local parts are processed. In humans, on the other hand, the global configuration strongly affects processing of local parts. For example, vernier offset information can be "rescued" by certain global configurations.

This difference could not be remedied by a different *training* protocol. Indeed, all our results also hold for Geirhos et al.'s shape-biased ffCNN. We suggest that although Geirhos et al.'s training procedure successfully biased the networks towards global features, it does not show human-like global shape computations. Indeed, the network still seems limited to combining features by pooling along a feedforward cascade. Hence, unlike in humans, global configuration cannot affect processing of local parts.

We suggest that the inability of ffCNNs to perform human-like object shape processing is deeply rooted in their feedforward pooling *architecture*. Global processing is not only an issue for ffCNNs but for other models too. We showed that no existing model of crowding based on local and feedforward computations can explain uncrowding (we did not address ffCNNs thoroughly in these previous studies; Doerig et al., 2019; Herzog & Manassi, 2015; Manassi et al., 2016; Pachai, Doerig, & Herzog, 2016). There seems to be a principled difference in computational strategies, based on architecture, between humans and feedforward pooling systems.

Hence, despite their well-known power, further aspects need to be incorporated into ffCNNs. We propose that recurrent, global grouping and segmentation is crucial to explain how the brain deals with global configurations (Doerig, et al., 2019). Specifically, we propose that a flexible recurrent grouping process determines which elements are grouped into an object. In the case of (un)crowding, elements are first grouped together and then only elements within a group interfere with each other. If the configuration of flankers ungroups from the target, the target is released from crowding. Francis, Manassi, and Herzog (2017) proposed a spiking neural network with a dedicated recurrent grouping process, which is able to explain why (un)crowding occurs (see also Bornet et al., 2019). However, this model is tailored to group oriented edges and cannot generalize to grouping of more complex features. Deep learning models are promising because they are more flexible and can be trained to deal with any kind of stimulus.

Doerig, Schmittwilken, Manassi, & Herzog (2019) showed that capsules networks (Sabour, Frosst, & Hinton, 2017), combining CNNs with a recurrent grouping and segmentation process, can explain (un)crowding, including temporal characteristics of uncrowding. Linsley et al. (2018) proposed recurrent grouping and segmentation modules to improve CNNs, and there are several other approaches to experiment with grouping and segmentation in recurrent network architectures (Lotter, Kreiman, & Cox, 2016; Nayebi et al., 2018; Spoerer, Kietzmann, & Kriegeskorte, 2019; Spoerer, McClure, & Kriegeskorte, 2017). More work is needed to compare and characterize computations in different recurrent architectures.

Our results contribute to the expanding literature showing that there is much more to vision than combining local feature detectors in a feedforward hierarchical manner (Baker et al., 2018; Brendel & Bethge, 2019; Doerig et al., 2019; Funke et al., 2018; Kar, Kubilius, Schmidt, Issa, & DiCarlo, 2019; Kietzmann et al., 2019; Kim, Linsley, Thakkar, & Serre, 2019; Lamme & Roelfsema, 2000; Linsley et al., 2018; Sabour et al., 2017; Spoerer et al., 2019, 2017; Tang et al., 2018; Wallis et al., 2019). In line with the present findings, many studies have highlighted other fundamental differences between ffCNNs and humans in local vs. global processing. For example, Baker et al. (2018) showed that ffCNNs but not humans are affected by local changes to edges and textures of objects. Brendel and Bethge (2019) showed that ffCNNs classify ImageNet images almost as well when using small local image patches than when using the entire images. These results

clearly show that image classification is underconstrained as a testbed. For this reason, well-controlled psychophysical stimuli, which allow detailed analysis, should be used in addition to image classification (RichardWebster, Anthony, & Scheirer, 2018). Simply testing whether deep learning systems reproduce idiosyncratic illusions, without linking them to computational mechanisms, does not provide principled insights. Hence, an important question will be what are the crucial benchmarks targeting principled computational processes. Here, using crowding, we showed a fundamental difference in local vs. global processing between humans and ffcNNs, and suggest that grouping and segmentation are promising additions to make deep neural networks better models of vision.

Historically, psychophysical results were seen as stepping stones towards object recognition models. Today, the picture has been reversed: we have powerful artificial vision models, but they do not reproduce even simple psychophysical results. The fact that ffcNNs can solve complex visual tasks in a different way than humans reveals that there are many ways of doing so. There are many roads to Rome. Despite the diversity of possible strategies to solve complex vision tasks, deep insights can be derived by comparing the crucial underlying computations adopted by different systems.

## Acknowledgements

Adrien Doerig & Oh-Hyeon Choung were supported by the Swiss National Science Foundation grant n.176153 “Basics of visual processing: from elements to figures”. Alban Bornet was supported by the European Union's Horizon 2020 Framework Programme for Research and Innovation under the Specific Grant Agreement No. 785907 (Human Brain Project SGA2). The funders had no role in study design, data collection and analysis, decision to publish, or preparation of the manuscript.

# References

- Baker, N., Lu, H., Erlikhman, G., & Kellman, P. J. (2018). Deep convolutional networks do not classify based on global object shape. *PLoS Computational Biology*, 14(12), e1006613.
- Bornet, A., Kaiser, J., Kroner, A., Falotico, E., Ambrosano, A., Cantero, K., ... Francis, G. (2019). Running large-scale simulations on the Neurorobotics Platform to understand vision-the case of visual crowding. *Frontiers in Neurobotics*, 13, 33.
- Brendel, W., & Bethge, M. (2019). Approximating CNNs with Bag-of-local-Features models works surprisingly well on ImageNet. *ArXiv Preprint ArXiv:1904.00760*.
- Clevert, D.-A., Unterthiner, T., & Hochreiter, S. (2015). Fast and accurate deep network learning by exponential linear units (elus). *ArXiv Preprint ArXiv:1511.07289*.
- Deng, J., Dong, W., Socher, R., Li, L.-J., Li, K., & Fei-Fei, L. (2009). Imagenet: A large-scale hierarchical image database. *2009 IEEE Conference on Computer Vision and Pattern Recognition*, 248–255.
- Doerig, A., Bornet, A., Rosenholtz, R., Francis, G., Clarke, A. M., & Herzog, M. H. (2019). Beyond Bouma's window: How to explain global aspects of crowding? *PLOS Computational Biology*, 15(5), e1006580. <https://doi.org/10.1371/journal.pcbi.1006580>
- Doerig, A., Schmittwilken, L., Manassi, M., & Herzog, M. H. (2019). Towards Global Recurrent Models of Visual Processing: Capsule Networks. *Conference on Cognitive Computational Neuroscience*, Submission ID, 1066.
- Eslami, S. A., Rezende, D. J., Besse, F., Viola, F., Morcos, A. S., Garnelo, M., ... Gregor, K. (2018). Neural scene representation and rendering. *Science*, 360(6394), 1204–1210.
- Francis, G., Manassi, M., & Herzog, M. H. (2017). Neural dynamics of grouping and segmentation explain properties of visual crowding. *Psychological Review*, 124(4), 483.

350 Funke, C. M., Borowski, J., Wallis, T. S. A., Brendel, W., Ecker, A. S., & Bethge, M. (2018). Comparing the  
351 ability of humans and DNNs to recognise closed contours in cluttered images. *18th Annual*  
352 *Meeting of the Vision Sciences Society (VSS 2018)*, 213.

353 Gatys, L. A., Ecker, A. S., & Bethge, M. (2016). Image style transfer using convolutional neural networks.  
354 *Proceedings of the IEEE Conference on Computer Vision and Pattern Recognition*, 2414–2423.

355 Geirhos, R., Rubisch, P., Michaelis, C., Bethge, M., Wichmann, F. A., & Brendel, W. (2018). ImageNet-  
356 trained CNNs are biased towards texture; increasing shape bias improves accuracy and  
357 robustness. *ArXiv Preprint ArXiv:1811.12231*.

358 Girshick, R., Radosavovic, I., Gkioxari, G., Dollár, P., & He, K. (2018). *Detectron*.

359 Goodfellow, I., Pouget-Abadie, J., Mirza, M., Xu, B., Warde-Farley, D., Ozair, S., ... Bengio, Y. (2014).  
360 Generative adversarial nets. *Advances in Neural Information Processing Systems*, 2672–2680.

361 He, K., Zhang, X., Ren, S., & Sun, J. (2016). Deep residual learning for image recognition. *Proceedings of*  
362 *the IEEE Conference on Computer Vision and Pattern Recognition*, 770–778.

363 Herzog, M. H., & Fahle, M. (2002). Effects of grouping in contextual modulation. *Nature*, 415(6870), 433.  
364 <https://doi.org/10.1038/415433a>

365 Herzog, M. H., & Manassi, M. (2015). Uncorking the bottleneck of crowding: A fresh look at object  
366 recognition. *Current Opinion in Behavioral Sciences*, 1, 86–93.

367 Ioffe, S., & Szegedy, C. (2015). Batch normalization: Accelerating deep network training by reducing  
368 internal covariate shift. *ArXiv Preprint ArXiv:1502.03167*.

369 Kar, K., Kubilius, J., Schmidt, K., Issa, E. B., & DiCarlo, J. J. (2019). Evidence that recurrent circuits are  
370 critical to the ventral stream’s execution of core object recognition behavior. *Nature*  
371 *Neuroscience*, 22(6), 974.

372 Karras, T., Laine, S., & Aila, T. (2018). A style-based generator architecture for generative adversarial  
373 networks. *ArXiv Preprint ArXiv:1812.04948*.



374 Khaligh-Razavi, S.-M., & Kriegeskorte, N. (2014). Deep supervised, but not unsupervised, models may  
375 explain IT cortical representation. *PLoS Computational Biology*, 10(11), e1003915.

376 Kietzmann, T. C., McClure, P., & Kriegeskorte, N. (2018). Deep neural networks in computational  
377 neuroscience. *BioRxiv*, 133504.

378 Kietzmann, T. C., Spoerer, C. J., Sörensen, L., Cichy, R. M., Hauk, O., & Kriegeskorte, N. (2019). Recurrence  
379 required to capture the dynamic computations of the human ventral visual stream. *ArXiv Preprint*  
380 *ArXiv:1903.05946*.

381 Kim, J., Linsley, D., Thakkar, K., & Serre, T. (2019). Disentangling neural mechanisms for perceptual  
382 grouping. *ArXiv Preprint ArXiv:1906.01558*.

383 Kim, T., Bair, W., & Pasupathy, A. (2019). Neural coding for shape and texture in macaque area V4. *Journal*  
384 *of Neuroscience*, 39(24), 4760–4774.

385 Kingma, D. P., & Ba, J. (2014). Adam: A method for stochastic optimization. *ArXiv Preprint*  
386 *ArXiv:1412.6980*.

387 Krizhevsky, A., Sutskever, I., & Hinton, G. E. (2012). Imagenet classification with deep convolutional neural  
388 networks. *Advances in Neural Information Processing Systems*, 1097–1105.

389 Lamme, V. A., & Roelfsema, P. R. (2000). The distinct modes of vision offered by feedforward and  
390 recurrent processing. *Trends in Neurosciences*, 23(11), 571–579.

391 Lindsey, J., Ocko, S. A., Ganguli, S., & Deny, S. (2019). A unified theory of early visual representations from  
392 retina to cortex through anatomically constrained deep CNNs. *ArXiv Preprint ArXiv:1901.00945*.

393 Linsley, D., Kim, J., & Serre, T. (2018). Sample-efficient image segmentation through recurrence.  
394 *ArXiv:1811.11356 [Cs]*. Retrieved from <http://arxiv.org/abs/1811.11356>

395 Lotter, W., Kreiman, G., & Cox, D. (2016). Deep predictive coding networks for video prediction and  
396 unsupervised learning. *ArXiv Preprint ArXiv:1605.08104*.

397 Manassi, M., Lonchamp, S., Clarke, A., & Herzog, M. H. (2016). What crowding can tell us about object  
398 representations. *Journal of Vision*, 16(3), 35–35. <https://doi.org/10.1167/16.3.35>

399 Manassi, M., Sayim, B., & Herzog, M. H. (2012). Grouping, pooling, and when bigger is better in visual  
400 crowding. *Journal of Vision*, 12(10), 13–13. <https://doi.org/10.1167/12.10.13>

401 Nayebi, A., Bear, D., Kubilius, J., Kar, K., Ganguli, S., Sussillo, D., ... Yamins, D. L. (2018). Task-Driven  
402 Convolutional Recurrent Models of the Visual System. *ArXiv Preprint ArXiv:1807.00053*.

403 Oberfeld, D., & Stahn, P. (2012). Sequential grouping modulates the effect of non-simultaneous masking  
404 on auditory intensity resolution. *PloS One*, 7(10), e48054.

405 Overvliet, K. E., & Sayim, B. (2016). Perceptual grouping determines haptic contextual modulation. *Vision*  
406 *Research*, 126(Supplement C), 52–58. <https://doi.org/10.1016/j.visres.2015.04.016>

407 Pachai, M. V., Doerig, A. C., & Herzog, M. H. (2016). How best to unify crowding? *Current Biology*, 26(9),  
408 R352–R353. <https://doi.org/10.1016/j.cub.2016.03.003>

409 RichardWebster, B., Anthony, S., & Scheirer, W. (2018). Psyphy: A psychophysics driven evaluation  
410 framework for visual recognition. *IEEE Transactions on Pattern Analysis and Machine Intelligence*.

411 Sabour, S., Frosst, N., & Hinton, G. E. (2017). Dynamic routing between capsules. *Advances in Neural*  
412 *Information Processing Systems*, 3856–3866.

413 Sayim, B., Westheimer, G., & Herzog, M. H. (2010). Gestalt factors modulate basic spatial vision.  
414 *Psychological Science*, 21(5), 641–644.

415 Spoerer, C. J., Kietzmann, T. C., & Kriegeskorte, N. (2019). Recurrent networks can recycle neural  
416 resources to flexibly trade speed for accuracy in visual recognition. *BioRxiv*, 677237.

417 Spoerer, C. J., McClure, P., & Kriegeskorte, N. (2017). Recurrent convolutional neural networks: A better  
418 model of biological object recognition. *Frontiers in Psychology*, 8, 1551.

Tang, H., Schrimpf, M., Lotter, W., Moerman, C., Paredes, A., Caro, J. O., ... Kreiman, G. (2018). Recurrent computations for visual pattern completion. *Proceedings of the National Academy of Sciences*, 115(35), 8835–8840.

VanRullen, R. (2017). Perception science in the age of deep neural networks. *Frontiers in Psychology*, 8, 142.

Wallis, T. S., Funke, C. M., Ecker, A. S., Gatys, L. A., Wichmann, F. A., & Bethge, M. (2019). Image content is more important than Bouma’s Law for scene metamers. *ELife*, 8, e42512.

Whitney, D., & Levi, D. M. (2011). Visual crowding: A fundamental limit on conscious perception and object recognition. *Trends in Cognitive Sciences*, 15(4), 160–168.  
<https://doi.org/10.1016/j.tics.2011.02.005>

Yamins, D. L., Hong, H., Cadieu, C. F., Solomon, E. A., Seibert, D., & DiCarlo, J. J. (2014). Performance-optimized hierarchical models predict neural responses in higher visual cortex. *Proceedings of the National Academy of Sciences*, 111(23), 8619–8624.

Zeiler, M. D., & Fergus, R. (2014). Visualizing and understanding convolutional networks. *European Conference on Computer Vision*, 818–833. Springer.

Zhang, R., Isola, P., Efros, A. A., Shechtman, E., & Wang, O. (2018). The unreasonable effectiveness of deep features as a perceptual metric. *Proceedings of the IEEE Conference on Computer Vision and Pattern Recognition*, 586–595.
